# Supplementary material for: Spin-state energies of heme-related models from spin-flip TDDFT calculations
Source: Royal Society of Chemistry journal article supplement (doi:10.1039/c6cp04826a), 2016-01-01
Supplement: c6cp04826a1.pdf [file c6cp04826a1.pdf]

## SUPPORTING INFORMATION

### Spin-State Energies of Heme-Related Models from Spin-Flip

### TDDFT Calculations

Hui Zhao<sup>1</sup>, Changfeng Fang<sup>2\*</sup>, Jun Gao<sup>1,3\*</sup>, Chengbu Liu<sup>1</sup>

<sup>1</sup> Institute of Theoretical Chemistry, School of Chemistry & Chemical Engineering, Shandong University, Jinan, 250100, Shandong, People's Republic of China

<sup>2</sup> Department of Physics, Jining University, Qufu, 273155, Shandong, People's Republic of China

<sup>3</sup> Hubei Key Laboratory of Agricultural Bioinformatics, College of Informatics, Huazhong Agricultural University, Wuhan, 430070, Hubei, People's Republic of China

#### Table of contents

|                    |           |
|--------------------|-----------|
| Table S1           | page 2    |
| Table S2           | page 3    |
| Table S3-Table S34 | page 4-24 |
| Table S35          | page 25   |

## Spin-state energies

Table S1.

SF-TDDFT calculated excitation energies (in eV) with def2-TZVP basis set with different functionals (SVWN5-LC-BLYP).

|                                  |       | SVWN5 | BLYP  | B3LYP | BHandHLYP | CAM-B3LYP | LC-BLYP |
|----------------------------------|-------|-------|-------|-------|-----------|-----------|---------|
| FeA <sub>2</sub> SH              | D-Q   | -0.15 | 0.22  | 0.09  | -0.15     | 0.06      | -0.38   |
|                                  | Q-S   | 0.75  | 1.13  | 0.56  | -0.28     | 0.47      | 1.03    |
| FeL <sub>2</sub> SH              | D-Q   | 0.93  | 1.21  | 0.88  | 0.38      | 0.75      | 1.15    |
|                                  | Q-S   | 1.23  | 1.34  | -0.43 | 0.55      | 1.17      | 1.00    |
| FeA <sub>2</sub> Cl              | D-Q   | -0.28 | 0.10  | -0.13 | -0.46     | -0.19     | -0.12   |
|                                  | Q-S   | 0.73  | 1.10  | 0.54  | -0.27     | 0.46      | 0.99    |
| FeL <sub>2</sub> Cl              | D-Q   | 0.45  | 0.68  | 0.26  | -0.23     | 0.13      | 0.60    |
|                                  | Q-S   | 1.45  | 1.75  | 1.20  | 0.33      | 1.11      | 1.73    |
| FePCl                            | D-Q   | 0.18  | 0.10  | 0.02  | -0.21     | 0.01      | 0.08    |
|                                  | Q-S   | 0.90  | 1.26  | 0.65  | -0.46     | 0.55      | 1.21    |
| FeA <sub>2</sub>                 | S0-S1 | 0.89  | 0.63  | -0.33 | -0.29     | -0.31     | 0.63    |
|                                  | S0-T  | 0.09  | -0.17 | -1.25 | -1.32     | -1.26     | -0.27   |
|                                  | S-T   | 0.09  | -0.17 | -0.92 | -1.03     | -0.95     | -0.27   |
|                                  | T-Q   | 0.20  | 0.41  | 0.55  | -0.08     | 0.42      | 0.06    |
| FeL <sub>2</sub>                 | S0-S1 | 1.74  | 0.32  | -0.12 | -0.55     | -0.29     | 0.45    |
|                                  | S0-T  | 0.90  | -0.56 | -1.24 | -1.83     | -1.48     | -0.30   |
|                                  | S-T   | 0.90  | -0.56 | -1.11 | -1.28     | -1.20     | -0.75   |
|                                  | T-Q   | 1.43  | 2.02  | 1.43  | 0.68      | 1.32      | 0.64    |
| FeA <sub>2</sub> CN <sup>-</sup> | S0-S1 | 0.78  | 0.94  | 1.05  | 1.00      | 1.05      | 0.56    |
|                                  | S0-T  | 0.32  | 0.42  | 0.35  | 0.15      | 0.30      | 0.19    |
|                                  | S-T   | 0.32  | 0.42  | 0.35  | 0.15      | 0.30      | 0.19    |
|                                  | T-Q   | 0.38  | 0.72  | 0.18  | -0.42     | 0.05      | 0.60    |
| FeL <sub>2</sub> CN <sup>-</sup> | S0-S1 | 1.28  | 1.41  | 1.56  | 1.41      | 1.51      | 0.93    |
|                                  | S0-T  | 0.98  | 1.00  | 0.84  | 0.55      | 0.75      | 0.82    |
|                                  | S-T   | 0.98  | 1.00  | 0.84  | 0.55      | 0.75      | 0.82    |
|                                  | T-Q   | 1.61  | 1.74  | 1.53  | 0.72      | 1.39      | 1.55    |
| FeA <sub>2</sub> NH <sub>3</sub> | S0-S1 | 0.56  | 0.75  | 0.81  | 0.75      | 0.81      | 0.29    |
|                                  | S0-T  | -0.09 | 0.06  | -0.02 | -0.19     | -0.06     | -0.22   |
|                                  | S-T   | -0.09 | 0.06  | -0.02 | -0.19     | -0.06     | -0.22   |
|                                  | T-Q   | 0.62  | 0.98  | 0.45  | -0.14     | 0.32      | 0.87    |
| FeL <sub>2</sub> NH <sub>3</sub> | S0-S1 | 0.70  | 0.84  | 0.91  | 0.86      | 0.90      | 0.44    |
|                                  | S0-T  | 0.07  | 0.16  | 0.08  | -0.10     | 0.03      | -0.02   |

|                                  |       |       |       |       |       |       |       |
|----------------------------------|-------|-------|-------|-------|-------|-------|-------|
|                                  | S-T   | 0.07  | 0.16  | 0.08  | -0.10 | 0.03  | -0.02 |
|                                  | T-Q   | 1.83  | 2.01  | 1.69  | 0.89  | 1.58  | 1.67  |
| FeP                              | S0-S1 | 0.57  | 0.53  | -0.04 | -0.08 | -2.32 | 0.65  |
|                                  | S0-T  | -0.03 | -0.33 | -1.05 | -1.12 | -2.63 | -0.09 |
|                                  | S-T   | -0.03 | -0.33 | -1.00 | -1.05 | -0.31 | -0.09 |
|                                  | T-Q   | -0.18 | 0.94  | 1.00  | 0.33  | 0.76  | -1.67 |
| FeOL <sub>2</sub> Cl             | D-Q   | -0.07 | -0.29 | -0.06 | -0.06 | 0.03  | -0.18 |
|                                  | Q-S   | 1.75  | 2.42  | 1.91  | 2.13  | 1.86  | 2.38  |
| FeL <sub>2</sub> OH <sub>2</sub> | S0-S1 | 0.49  | 0.27  | -0.90 | 0.48  | -1.05 | -0.99 |
|                                  | S0-T  | -0.13 | -0.48 | -1.95 | -0.12 | -2.18 | -2.07 |
|                                  | S-T   | -0.62 | -0.74 | -1.05 | -0.60 | -1.13 | -1.08 |
|                                  | T-Q   | 1.69  | 1.96  | 1.34  | 1.73  | 1.23  | 1.55  |

Table S2

The  $\Delta$ SCF calculated spin-state energies (in eV) with 6-311++g (d,p) basis set with various functionals (SVWN5-LC-BLYP).

|                                  |      | SVWN5 | BLYP  | B3LYP | BHHLYP | CAM-B3LYP | LC-BLYP |
|----------------------------------|------|-------|-------|-------|--------|-----------|---------|
| FeA <sub>2</sub> SH              | D-Q  | -0.30 | -0.40 | -0.86 | -1.02  | -0.91     | -0.56   |
|                                  | Q-S  | 0.45  | 0.13  | -0.25 | -0.90  | -0.25     | -0.03   |
| FeL <sub>2</sub> SH              | D-Q  | 0.95  | 0.50  | 0.02  | -0.57  | 0.56      | 0.62    |
|                                  | Q-S  | 1.06  | 0.55  | 0.14  | -0.56  | -0.47     | -0.24   |
| FeA <sub>2</sub> Cl              | D-Q  | -0.55 | -0.58 | -0.78 | -1.07  | -2.74     | -1.94   |
|                                  | Q-S  | 0.49  | 0.19  | -0.17 | -0.82  | -0.18     | 0.04    |
| FeL <sub>2</sub> Cl              | D-Q  | 0.29  | -0.02 | -0.39 | -0.81  | 0.28      | -1.66   |
|                                  | Q-S  | 1.09  | 0.59  | 0.13  | -0.61  | -0.60     | 0.39    |
| FePCl                            | D-Q  | -0.15 | -0.31 | -0.56 | -0.89  | -0.58     | -0.25   |
|                                  | Q-S  | 0.69  | 0.37  | -0.05 | -0.74  | -0.07     | -0.60   |
| FeA <sub>2</sub>                 | S1-T | -0.57 | -0.39 | -0.48 | -0.47  | -1.78     | -6.17   |
|                                  | T-Q  | 0.34  | 0.02  | 0.06  | -0.57  | -0.32     | -0.18   |
| FeL <sub>2</sub>                 | S1-T | -0.45 | -0.34 | -0.50 | -0.56  | -1.56     | -0.59   |
|                                  | T-Q  | 1.59  | 1.03  | 0.51  | -0.24  | 0.47      | -0.41   |
| FeA <sub>2</sub> CN <sup>-</sup> | S1-T | 0.11  | -0.13 | -0.39 | -0.69  | -0.49     | -0.48   |
|                                  | T-Q  | 0.28  | -0.26 | -0.82 | -1.51  | -0.86     | -0.71   |
| FeL <sub>2</sub> CN <sup>-</sup> | S1-T | 0.63  | 0.24  | -0.11 | -0.61  | -0.19     | -0.17   |
|                                  | T-Q  | 1.30  | 0.54  | -0.13 | -1.04  | -0.21     | -0.06   |
| FeA <sub>2</sub> NH <sub>3</sub> | S1-T | -0.29 | -0.45 | -0.53 | -0.60  | -0.84     | -0.45   |
|                                  | T-Q  | 0.37  | 0.07  | -0.43 | -1.10  | -0.48     | -0.33   |

|                                  |      |       |       |       |       |       |       |
|----------------------------------|------|-------|-------|-------|-------|-------|-------|
| FeL <sub>2</sub> NH <sub>3</sub> | S1-T | -0.22 | -0.48 | -0.58 | -0.68 | -0.68 | -0.47 |
|                                  | T-Q  | 1.50  | 0.81  | 0.19  | -0.68 | 0.11  | 0.27  |
| FeP                              | S1-T | -0.65 | -0.52 | -0.57 | -0.58 | -2.04 | -0.30 |
|                                  | T-Q  | 1.12  | 0.69  | 0.58  | -0.07 | 2.01  | -0.05 |
| FeOL <sub>2</sub> Cl             | D-Q  | 0.20  | -0.02 | -0.65 | --*   | -0.03 | -0.22 |
|                                  | Q-S  | 1.68  | 1.04  | 0.71  | -0.37 | 0.09  | 0.47  |
| FeL <sub>2</sub> OH <sub>2</sub> | S1-T | --*   | -1.11 | -1.12 | -1.14 | -2.53 | -2.56 |
|                                  | T-Q  | 1.46  | 0.88  | 0.31  | -0.48 | 0.24  | 0.40  |

\*The calculations failed to converge.

## Cartesian Coordinates

Table S3

Structure of FeP, singlet, atomic coordinates in Å

|    |             |             |            |
|----|-------------|-------------|------------|
| Fe | 0.00000000  | 0.00000000  | 0.00000000 |
| N  | 1.40803810  | -1.40803810 | 0.00000000 |
| N  | 1.40803810  | 1.40803810  | 0.00000000 |
| N  | -1.40803810 | -1.40803810 | 0.00000000 |
| N  | -1.40803810 | 1.40803810  | 0.00000000 |
| C  | -2.78142160 | 1.22776210  | 0.00000000 |
| C  | -1.22776210 | 2.78142160  | 0.00000000 |
| C  | -2.49789700 | 3.46184160  | 0.00000000 |
| C  | -3.46184160 | 2.49789700  | 0.00000000 |
| C  | -3.42456330 | 0.00000000  | 0.00000000 |
| C  | -2.78142160 | -1.22776210 | 0.00000000 |
| C  | -3.46184160 | -2.49789700 | 0.00000000 |
| C  | -2.49789700 | -3.46184160 | 0.00000000 |
| C  | -1.22776210 | -2.78142160 | 0.00000000 |
| C  | 0.00000000  | -3.42456330 | 0.00000000 |
| C  | 1.22776210  | -2.78142160 | 0.00000000 |
| C  | 2.49789700  | -3.46184160 | 0.00000000 |
| C  | 3.46184160  | -2.49789700 | 0.00000000 |
| C  | 2.78142160  | -1.22776210 | 0.00000000 |
| C  | 3.42456330  | 0.00000000  | 0.00000000 |
| C  | 2.78142160  | 1.22776210  | 0.00000000 |
| C  | 3.46184160  | 2.49789700  | 0.00000000 |
| C  | 2.49789700  | 3.46184160  | 0.00000000 |
| C  | 1.22776210  | 2.78142160  | 0.00000000 |
| C  | 0.00000000  | 3.42456330  | 0.00000000 |
| H  | 0.00000000  | 4.51485170  | 0.00000000 |
| H  | -2.61822570 | 4.54198370  | 0.00000000 |

|   |             |             |            |
|---|-------------|-------------|------------|
| H | -4.54198370 | 2.61822570  | 0.00000000 |
| H | -4.51485170 | 0.00000000  | 0.00000000 |
| H | -4.54198370 | -2.61822570 | 0.00000000 |
| H | -2.61822570 | -4.54198370 | 0.00000000 |
| H | 0.00000000  | -4.51485170 | 0.00000000 |
| H | 2.61822570  | -4.54198370 | 0.00000000 |
| H | 4.54198370  | -2.61822570 | 0.00000000 |
| H | 4.51485170  | 0.00000000  | 0.00000000 |
| H | 4.54198370  | 2.61822570  | 0.00000000 |
| H | 2.61822570  | 4.54198370  | 0.00000000 |

Table S4

Structure of FeP, triplet, atomic coordinates in Å.

|    |             |             |            |
|----|-------------|-------------|------------|
| Fe | 0.00000000  | 0.00000000  | 0.00000000 |
| N  | 1.40400810  | -1.41060290 | 0.00000000 |
| N  | 1.40400810  | 1.41060290  | 0.00000000 |
| N  | -1.40400810 | -1.41060290 | 0.00000000 |
| N  | -1.40400810 | 1.41060290  | 0.00000000 |
| C  | -2.77665270 | 1.22789640  | 0.00000000 |
| C  | -1.22641460 | 2.78646090  | 0.00000000 |
| C  | -2.49565100 | 3.46412030  | 0.00000000 |
| C  | -3.45730420 | 2.49600860  | 0.00000000 |
| C  | -3.41997990 | 0.00000000  | 0.00000000 |
| C  | -2.77665270 | -1.22789640 | 0.00000000 |
| C  | -3.45730420 | -2.49600860 | 0.00000000 |
| C  | -2.49565100 | -3.46412030 | 0.00000000 |
| C  | -1.22641460 | -2.78646090 | 0.00000000 |
| C  | 0.00000000  | -3.43160010 | 0.00000000 |
| C  | 1.22641460  | -2.78646090 | 0.00000000 |
| C  | 2.49565100  | -3.46412030 | 0.00000000 |
| C  | 3.45730420  | -2.49600860 | 0.00000000 |
| C  | 2.77665270  | -1.22789640 | 0.00000000 |
| C  | 3.41997990  | 0.00000000  | 0.00000000 |
| C  | 2.77665270  | 1.22789640  | 0.00000000 |
| C  | 3.45730420  | 2.49600860  | 0.00000000 |
| C  | 2.49565100  | 3.46412030  | 0.00000000 |
| C  | 1.22641460  | 2.78646090  | 0.00000000 |
| C  | 0.00000000  | 3.43160010  | 0.00000000 |
| H  | 0.00000000  | 4.52168330  | 0.00000000 |
| H  | -2.61900550 | 4.54373500  | 0.00000000 |
| H  | -4.53775780 | 2.61482080  | 0.00000000 |
| H  | -4.51022020 | 0.00000000  | 0.00000000 |
| H  | -4.53775780 | -2.61482080 | 0.00000000 |

|   |             |             |            |
|---|-------------|-------------|------------|
| H | -2.61900550 | -4.54373500 | 0.00000000 |
| H | 0.00000000  | -4.52168330 | 0.00000000 |
| H | 2.61900550  | -4.54373500 | 0.00000000 |
| H | 4.53775780  | -2.61482080 | 0.00000000 |
| H | 4.51022020  | 0.00000000  | 0.00000000 |
| H | 4.53775780  | 2.61482080  | 0.00000000 |
| H | 2.61900550  | 4.54373500  | 0.00000000 |

Table S5

Structure of FePCl, doublet, atomic coordinates in Å.

|    |             |             |            |
|----|-------------|-------------|------------|
| Fe | 0.00000000  | 0.00000000  | 0.02843460 |
| N  | 1.40706740  | -1.39682670 | 0.23866330 |
| N  | 1.40706740  | 1.39682670  | 0.23866330 |
| N  | -1.40706740 | -1.39682670 | 0.23866330 |
| N  | -1.40706740 | 1.39682670  | 0.23866330 |
| C  | -2.77974980 | 1.22393950  | 0.31160540 |
| C  | -1.22650610 | 2.76674740  | 0.16131150 |
| C  | -2.49199390 | 3.45154560  | 0.20045650 |
| C  | -3.45697680 | 2.49334000  | 0.30272550 |
| C  | -3.42459980 | 0.00000000  | 0.35850790 |
| C  | -2.77974980 | -1.22393950 | 0.31160540 |
| C  | -3.45697680 | -2.49334000 | 0.30272550 |
| C  | -2.49199390 | -3.45154560 | 0.20045650 |
| C  | -1.22650610 | -2.76674740 | 0.16131150 |
| C  | 0.00000000  | -3.40709300 | 0.10282020 |
| C  | 1.22650610  | -2.76674740 | 0.16131150 |
| C  | 2.49199390  | -3.45154560 | 0.20045650 |
| C  | 3.45697680  | -2.49334000 | 0.30272550 |
| C  | 2.77974980  | -1.22393950 | 0.31160540 |
| C  | 3.42459980  | 0.00000000  | 0.35850790 |
| C  | 2.77974980  | 1.22393950  | 0.31160540 |
| C  | 3.45697680  | 2.49334000  | 0.30272550 |
| C  | 2.49199390  | 3.45154560  | 0.20045650 |
| C  | 1.22650610  | 2.76674740  | 0.16131150 |
| C  | 0.00000000  | 3.40709300  | 0.10282020 |
| H  | 0.00000000  | 4.49576350  | 0.04480170 |
| H  | -2.60970140 | 4.53129280  | 0.16236970 |
| H  | -4.53460080 | 2.61813640  | 0.36485160 |
| H  | -4.51343170 | 0.00000000  | 0.41038720 |
| H  | -4.53460080 | -2.61813640 | 0.36485160 |
| H  | -2.60970140 | -4.53129280 | 0.16236970 |
| H  | 0.00000000  | -4.49576350 | 0.04480170 |
| H  | 2.60970140  | -4.53129280 | 0.16236970 |

|    |            |             |             |
|----|------------|-------------|-------------|
| H  | 4.53460080 | -2.61813640 | 0.36485160  |
| H  | 4.51343170 | 0.00000000  | 0.41038720  |
| H  | 4.53460080 | 2.61813640  | 0.36485160  |
| H  | 2.60970140 | 4.53129280  | 0.16236970  |
| Cl | 0.00000000 | 0.00000000  | -2.14315810 |

Table S6

Structure of FePCl, quartet, atomic coordinates in Å.

|    |             |             |             |
|----|-------------|-------------|-------------|
| Fe | 0.00000000  | 0.00000000  | -0.04725880 |
| N  | 1.41113250  | -1.41113250 | 0.24986670  |
| N  | 1.41113250  | 1.41113250  | 0.24986670  |
| N  | -1.41113250 | -1.41113250 | 0.24986670  |
| N  | -1.41113250 | 1.41113250  | 0.24986670  |
| C  | -2.77989840 | 1.22676340  | 0.26582480  |
| C  | -1.22676340 | 2.77989840  | 0.26582480  |
| C  | -2.49462430 | 3.45973260  | 0.29540020  |
| C  | -3.45973260 | 2.49462430  | 0.29540020  |
| C  | -3.42517290 | 0.00000000  | 0.26405080  |
| C  | -2.77989840 | -1.22676340 | 0.26582480  |
| C  | -3.45973260 | -2.49462430 | 0.29540020  |
| C  | -2.49462430 | -3.45973260 | 0.29540020  |
| C  | -1.22676340 | -2.77989840 | 0.26582480  |
| C  | 0.00000000  | -3.42517290 | 0.26405080  |
| C  | 1.22676340  | -2.77989840 | 0.26582480  |
| C  | 2.49462430  | -3.45973260 | 0.29540020  |
| C  | 3.45973260  | -2.49462430 | 0.29540020  |
| C  | 2.77989840  | -1.22676340 | 0.26582480  |
| C  | 3.42517290  | 0.00000000  | 0.26405080  |
| C  | 2.77989840  | 1.22676340  | 0.26582480  |
| C  | 3.45973260  | 2.49462430  | 0.29540020  |
| C  | 2.49462430  | 3.45973260  | 0.29540020  |
| C  | 1.22676340  | 2.77989840  | 0.26582480  |
| C  | 0.00000000  | 3.42517290  | 0.26405080  |
| H  | 0.00000000  | 4.51495270  | 0.27388630  |
| H  | -2.61515220 | 4.53952610  | 0.31621030  |
| H  | -4.53952610 | 2.61515220  | 0.31621030  |
| H  | -4.51495270 | 0.00000000  | 0.27388630  |
| H  | -4.53952610 | -2.61515220 | 0.31621030  |
| H  | -2.61515220 | -4.53952610 | 0.31621030  |
| H  | 0.00000000  | -4.51495270 | 0.27388630  |
| H  | 2.61515220  | -4.53952610 | 0.31621030  |
| H  | 4.53952610  | -2.61515220 | 0.31621030  |
| H  | 4.51495270  | 0.00000000  | 0.27388630  |

|    |            |            |             |
|----|------------|------------|-------------|
| H  | 4.53952610 | 2.61515220 | 0.31621030  |
| H  | 2.61515220 | 4.53952610 | 0.31621030  |
| Cl | 0.00000000 | 0.00000000 | -2.30242370 |

Table S7

Structure of FeA<sub>2</sub>, singlet, atomic coordinates in Å.

|    |             |             |            |
|----|-------------|-------------|------------|
| Fe | 0.00000000  | 0.00000000  | 0.00000000 |
| N  | 1.09082720  | -1.69589260 | 0.00000000 |
| N  | -1.09082720 | -1.69589260 | 0.00000000 |
| N  | -1.09082720 | 1.69589260  | 0.00000000 |
| N  | 1.09082720  | 1.69589260  | 0.00000000 |
| C  | 0.00000000  | 2.43383070  | 0.00000000 |
| C  | 0.00000000  | -2.43383070 | 0.00000000 |
| H  | -1.99249740 | -2.14193710 | 0.00000000 |
| H  | 0.00000000  | -3.52940160 | 0.00000000 |
| H  | 1.99249740  | -2.14193710 | 0.00000000 |
| H  | 1.99249740  | 2.14193710  | 0.00000000 |
| H  | 0.00000000  | 3.52940160  | 0.00000000 |
| H  | -1.99249740 | 2.14193710  | 0.00000000 |

Table S8

Structure of FeA<sub>2</sub>, triplet, atomic coordinates in Å.

|    |             |             |            |
|----|-------------|-------------|------------|
| Fe | 0.00000000  | 0.00000000  | 0.00000000 |
| N  | 1.08889980  | -1.67280640 | 0.00000000 |
| N  | -1.08889980 | -1.67280640 | 0.00000000 |
| N  | -1.08889980 | 1.67280640  | 0.00000000 |
| N  | 1.08889980  | 1.67280640  | 0.00000000 |
| C  | 0.00000000  | 2.41504980  | 0.00000000 |
| C  | 0.00000000  | -2.41504980 | 0.00000000 |
| H  | -1.99244650 | -2.11507050 | 0.00000000 |
| H  | 0.00000000  | -3.51028690 | 0.00000000 |
| H  | 1.99244650  | -2.11507050 | 0.00000000 |
| H  | 1.99244650  | 2.11507050  | 0.00000000 |
| H  | 0.00000000  | 3.51028690  | 0.00000000 |
| H  | -1.99244650 | 2.11507050  | 0.00000000 |

Table S9

Structure of FeA<sub>2</sub>NH<sub>3</sub>, singlet, atomic coordinates in Å.

|    |             |             |             |
|----|-------------|-------------|-------------|
| Fe | 0.00166240  | -0.17982270 | 0.00000000  |
| N  | 1.09169830  | -0.23534450 | -1.68777130 |
| N  | -1.09153260 | -0.24550150 | -1.69129640 |



|   |             |             |             |
|---|-------------|-------------|-------------|
| N | -1.09153260 | -0.24550150 | 1.69129640  |
| N | 1.09169830  | -0.23534450 | 1.68777130  |
| C | -0.00014280 | -0.24042400 | 2.44567680  |
| C | -0.00014280 | -0.24042400 | -2.44567680 |
| H | -2.00196900 | -0.25451500 | -2.14217150 |
| H | 0.00144330  | -0.27173710 | -3.55159620 |
| H | 2.00316410  | -0.27755740 | -2.13475610 |
| H | 2.00316410  | -0.27755740 | 2.13475610  |
| H | 0.00144330  | -0.27173710 | 3.55159620  |
| H | -2.00196900 | -0.25451500 | 2.14217150  |
| N | -0.00712520 | 1.75270450  | 0.00000000  |
| H | -0.96296810 | 2.12036320  | 0.00000000  |
| H | 0.48169590  | 2.09447140  | -0.83536570 |
| H | 0.48169590  | 2.09447140  | 0.83536570  |

Table S10

Structure of  $\text{FeA}_2\text{NH}_3$ , triplet, atomic coordinates in Å.

|    |             |             |             |
|----|-------------|-------------|-------------|
| Fe | -0.00550810 | -0.17717240 | 0.00000000  |
| N  | 1.07753470  | -0.33578580 | -1.65382600 |
| N  | -1.09355690 | -0.27665870 | -1.65791170 |
| N  | -1.09355690 | -0.27665870 | 1.65791170  |
| N  | 1.07753470  | -0.33578580 | 1.65382600  |
| C  | -0.00698500 | -0.30625020 | 2.42204090  |
| C  | -0.00698500 | -0.30625020 | -2.42204090 |
| H  | -2.00935020 | -0.24303260 | -2.09577110 |
| H  | -0.00537640 | -0.31445830 | -3.52710290 |
| H  | 1.99583310  | -0.36202430 | -2.08685630 |
| H  | 1.99583310  | -0.36202430 | 2.08685630  |
| H  | -0.00537640 | -0.31445830 | 3.52710290  |
| H  | -2.00935020 | -0.24303260 | 2.09577110  |
| N  | 0.05515140  | 2.06549320  | 0.00000000  |
| H  | -0.89182510 | 2.44699400  | 0.00000000  |
| H  | 0.54009140  | 2.41327350  | -0.82974310 |
| H  | 0.54009140  | 2.41327350  | 0.82974310  |

Table S11

Structure of  $\text{FeA}_2\text{CN}^-$ , singlet, atomic coordinates in Å.

|    |             |             |             |
|----|-------------|-------------|-------------|
| Fe | 0.00000000  | 0.00000000  | -0.23854890 |
| N  | -1.67532040 | 1.09784520  | -0.51459880 |
| N  | -1.67532040 | -1.09784520 | -0.51459880 |
| N  | 1.67532040  | -1.09784520 | -0.51459880 |
| N  | 1.67532040  | 1.09784520  | -0.51459880 |
| C  | 2.41893050  | 0.00000000  | -0.53942920 |

|   |             |             |             |
|---|-------------|-------------|-------------|
| C | -2.41893050 | 0.00000000  | -0.53942920 |
| H | -2.14712290 | -1.98520890 | -0.35690950 |
| H | -3.53133990 | 0.00000000  | -0.56089710 |
| H | -2.14712290 | 1.98520890  | -0.35690950 |
| H | 2.14712290  | 1.98520890  | -0.35690950 |
| H | 3.53133990  | 0.00000000  | -0.56089710 |
| H | 2.14712290  | -1.98520890 | -0.35690950 |
| C | 0.00000000  | 0.00000000  | 1.57867120  |
| N | 0.00000000  | 0.00000000  | 2.76444180  |

Table S12

Structure of  $\text{FeA}_2\text{CN}^-$ , triplet, atomic coordinates in Å.

|    |             |             |             |
|----|-------------|-------------|-------------|
| Fe | 0.00000000  | 0.00000000  | -0.20911740 |
| N  | -1.63895450 | 1.09388030  | -0.60815480 |
| N  | -1.63895450 | -1.09388030 | -0.60815480 |
| N  | 1.63895450  | -1.09388030 | -0.60815480 |
| N  | 1.63895450  | 1.09388030  | -0.60815480 |
| C  | 2.39333660  | 0.00000000  | -0.63320080 |
| C  | -2.39333660 | 0.00000000  | -0.63320080 |
| H  | -2.10660630 | -1.98191810 | -0.43984100 |
| H  | -3.50280290 | 0.00000000  | -0.60184090 |
| H  | -2.10660630 | 1.98191810  | -0.43984100 |
| H  | 2.10660630  | 1.98191810  | -0.43984100 |
| H  | 3.50280290  | 0.00000000  | -0.60184090 |
| H  | 2.10660630  | -1.98191810 | -0.43984100 |
| C  | 0.00000000  | 0.00000000  | 1.82339450  |
| N  | 0.00000000  | 0.00000000  | 3.00204280  |

Table S13

Structure of  $\text{FeA}_2\text{SH}$ , doublet, atomic coordinates in Å.

|    |             |             |             |
|----|-------------|-------------|-------------|
| Fe | 0.00244860  | -0.32497540 | 0.00000000  |
| N  | 1.08038860  | -0.57396900 | -1.60459210 |
| N  | -1.08760610 | -0.43263370 | -1.61746600 |
| N  | -1.08760610 | -0.43263370 | 1.61746600  |
| N  | 1.08038860  | -0.57396900 | 1.60459210  |
| C  | 0.00096790  | -0.50359980 | 2.37894260  |
| C  | 0.00096790  | -0.50359980 | -2.37894260 |
| H  | -2.00920860 | -0.29337640 | -2.03459670 |
| H  | 0.00813890  | -0.49561510 | -3.49361580 |
| H  | 2.01681290  | -0.49142210 | -2.00396060 |
| H  | 2.01681290  | -0.49142210 | 2.00396060  |

|   |             |             |            |
|---|-------------|-------------|------------|
| H | 0.00813890  | -0.49561510 | 3.49361580 |
| H | -2.00920860 | -0.29337640 | 2.03459670 |
| S | 0.20187100  | 1.94920740  | 0.00000000 |
| H | -1.13824660 | 2.20144540  | 0.00000000 |

Table S14

Structure of FeA<sub>2</sub>SH, quartet, atomic coordinates in Å.

|    |             |             |             |
|----|-------------|-------------|-------------|
| Fe | 0.01218660  | -0.11261630 | 0.00000000  |
| N  | 1.08122470  | -0.63687380 | -1.58474000 |
| N  | -1.09021340 | -0.52968820 | -1.59258390 |
| N  | -1.09021340 | -0.52968820 | 1.59258390  |
| N  | 1.08122470  | -0.63687380 | 1.58474000  |
| C  | -0.00153730 | -0.58342700 | 2.34961680  |
| C  | -0.00153730 | -0.58342700 | -2.34961680 |
| H  | -1.98927860 | -0.32808540 | -2.02097700 |
| H  | 0.00440780  | -0.54651830 | -3.45179150 |
| H  | 1.99652110  | -0.49309630 | -2.00257570 |
| H  | 1.99652110  | -0.49309630 | 2.00257570  |
| H  | 0.00440780  | -0.54651830 | 3.45179150  |
| H  | -1.98927860 | -0.32808540 | 2.02097700  |
| S  | 0.20180780  | 2.17627250  | 0.00000000  |
| H  | -1.13118280 | 2.41616650  | 0.00000000  |

Table S15

Structure of FeA<sub>2</sub>Cl, doublet, atomic coordinates in Å.

|    |             |             |             |
|----|-------------|-------------|-------------|
| Fe | 0.00000000  | 0.00000000  | 0.32986740  |
| N  | 1.61524170  | 1.08298890  | 0.56404040  |
| N  | 1.61524170  | -1.08298890 | 0.56404040  |
| N  | -1.61524170 | -1.08298890 | 0.56404040  |
| N  | -1.61524170 | 1.08298890  | 0.56404040  |
| C  | -2.38082950 | 0.00000000  | 0.56404040  |
| C  | 2.38082950  | 0.00000000  | 0.56404040  |
| H  | 2.01537880  | -2.00144210 | 0.40205510  |
| H  | 3.48294750  | 0.00000000  | 0.54943180  |
| H  | 2.01537880  | 2.00144210  | 0.40205510  |
| H  | -2.01537880 | 2.00144210  | 0.40205510  |
| H  | -3.48294750 | 0.00000000  | 0.54943180  |
| H  | -2.01537880 | -2.00144210 | 0.40205510  |
| Cl | 0.00000000  | 0.00000000  | -1.87015710 |

Table S16

Structure of FeA<sub>2</sub>Cl, quartet, atomic coordinates in Å.

|    |             |             |             |
|----|-------------|-------------|-------------|
| Fe | 0.00000000  | 0.00000000  | 0.20285890  |
| N  | 1.57955780  | 1.08758720  | 0.71116930  |
| N  | 1.57955780  | -1.08758720 | 0.71116930  |
| N  | -1.57955780 | -1.08758720 | 0.71116930  |
| N  | -1.57955780 | 1.08758720  | 0.71116930  |
| C  | -2.33934830 | 0.00000000  | 0.71116930  |
| C  | 2.33934830  | 0.00000000  | 0.71116930  |
| H  | 1.99745980  | -1.99271480 | 0.51321210  |
| H  | 3.44142440  | 0.00000000  | 0.67388240  |
| H  | 1.99745980  | 1.99271480  | 0.51321210  |
| H  | -1.99745980 | 1.99271480  | 0.51321210  |
| H  | -3.44142440 | 0.00000000  | 0.67388240  |
| H  | -1.99745980 | -1.99271480 | 0.51321210  |
| Cl | 0.00000000  | 0.00000000  | -2.02199660 |

Table S17

Structure of FeL<sub>2</sub>, singlet, atomic coordinates in Å.

|    |             |             |            |
|----|-------------|-------------|------------|
| Fe | 0.00000000  | 0.00000000  | 0.00000000 |
| N  | -1.37805880 | 1.38660100  | 0.00000000 |
| N  | -1.37805880 | -1.38660100 | 0.00000000 |
| N  | 1.37805880  | -1.38660100 | 0.00000000 |
| N  | 1.37805880  | 1.38660100  | 0.00000000 |
| C  | -1.22499300 | 2.69535760  | 0.00000000 |
| C  | 0.00000000  | 3.36241280  | 0.00000000 |
| C  | 1.22499300  | 2.69535760  | 0.00000000 |
| C  | -1.22499300 | -2.69535760 | 0.00000000 |
| C  | 0.00000000  | -3.36241280 | 0.00000000 |
| C  | 1.22499300  | -2.69535760 | 0.00000000 |
| H  | -2.12538910 | 3.30916670  | 0.00000000 |
| H  | 0.00000000  | 4.44231650  | 0.00000000 |
| H  | 2.12538910  | 3.30916670  | 0.00000000 |
| H  | 2.35289510  | 1.11448570  | 0.00000000 |
| H  | -2.35289510 | 1.11448570  | 0.00000000 |
| H  | -2.35289510 | -1.11448570 | 0.00000000 |
| H  | -2.12538910 | -3.30916670 | 0.00000000 |
| H  | 0.00000000  | -4.44231650 | 0.00000000 |
| H  | 2.12538910  | -3.30916670 | 0.00000000 |
| H  | 2.35289510  | -1.11448570 | 0.00000000 |

Table S18

Structure of FeL<sub>2</sub>, triplet, atomic coordinates in Å.

|    |             |             |            |
|----|-------------|-------------|------------|
| Fe | 0.00000000  | 0.00000000  | 0.00000000 |
| N  | -1.37147350 | 1.38128270  | 0.00000000 |
| N  | -1.37147350 | -1.38128270 | 0.00000000 |
| N  | 1.37147350  | -1.38128270 | 0.00000000 |
| N  | 1.37147350  | 1.38128270  | 0.00000000 |
| C  | -1.22149860 | 2.69058130  | 0.00000000 |
| C  | 0.00000000  | 3.36074100  | 0.00000000 |
| C  | 1.22149860  | 2.69058130  | 0.00000000 |
| C  | -1.22149860 | -2.69058130 | 0.00000000 |
| C  | 0.00000000  | -3.36074100 | 0.00000000 |
| C  | 1.22149860  | -2.69058130 | 0.00000000 |
| H  | -2.12277800 | 3.30412440  | 0.00000000 |
| H  | 0.00000000  | 4.44060240  | 0.00000000 |
| H  | 2.12277800  | 3.30412440  | 0.00000000 |
| H  | 2.34934230  | 1.11483790  | 0.00000000 |
| H  | -2.34934230 | 1.11483790  | 0.00000000 |
| H  | -2.34934230 | -1.11483790 | 0.00000000 |
| H  | -2.12277800 | -3.30412440 | 0.00000000 |
| H  | 0.00000000  | -4.44060240 | 0.00000000 |
| H  | 2.12277800  | -3.30412440 | 0.00000000 |
| H  | 2.34934230  | -1.11483790 | 0.00000000 |

Table S19

Structure of  $\text{FeL}_2\text{NH}_3$ , singlet, atomic coordinates in Å.

|    |             |            |             |
|----|-------------|------------|-------------|
| Fe | -0.00218310 | 0.06079870 | 0.00000000  |
| N  | -1.36904410 | 0.18675890 | 1.33896730  |
| N  | -1.36904410 | 0.18675890 | -1.33896730 |
| N  | 1.36059840  | 0.21857860 | -1.34234400 |
| N  | 1.36059840  | 0.21857860 | 1.34234400  |
| C  | -1.23948680 | 0.21866990 | 2.66355940  |
| C  | -0.00809750 | 0.20262360 | 3.33632500  |
| C  | 1.22448910  | 0.23669100 | 2.66780800  |
| C  | -1.23948680 | 0.21866990 | -2.66355940 |
| C  | -0.00809750 | 0.20262360 | -3.33632500 |
| C  | 1.22448910  | 0.23669100 | -2.66780800 |
| H  | -2.15249060 | 0.28460800 | 3.27008650  |
| H  | -0.00975670 | 0.23556610 | 4.42421860  |
| H  | 2.13434600  | 0.31011100 | 3.27841670  |
| H  | 2.34532590  | 0.27409840 | 1.05972010  |
| H  | -2.35350200 | 0.22972950 | 1.05248810  |
| H  | -2.35350200 | 0.22972950 | -1.05248810 |

|   |             |             |             |
|---|-------------|-------------|-------------|
| H | -2.15249060 | 0.28460800  | -3.27008650 |
| H | -0.00975670 | 0.23556610  | -4.42421860 |
| H | 2.13434600  | 0.31011100  | -3.27841670 |
| H | 2.34532590  | 0.27409840  | -1.05972010 |
| N | 0.05505820  | -1.88893400 | 0.00000000  |
| H | -0.88619230 | -2.29006730 | 0.00000000  |
| H | 0.54967830  | -2.22240210 | -0.83399670 |
| H | 0.54967830  | -2.22240210 | 0.83399670  |

Table S20

Structure of  $\text{FeL}_2\text{NH}_3$ , triplet, atomic coordinates in Å.

|    |             |             |             |
|----|-------------|-------------|-------------|
| Fe | -0.00222990 | 0.10499610  | 0.00000000  |
| N  | -1.36100430 | 0.21775360  | 1.33365260  |
| N  | -1.36100430 | 0.21775360  | -1.33365260 |
| N  | 1.35557320  | 0.23452920  | -1.33424610 |
| N  | 1.35557320  | 0.23452920  | 1.33424610  |
| C  | -1.23179330 | 0.24514410  | 2.66090170  |
| C  | -0.00340210 | 0.22613710  | 3.33254170  |
| C  | 1.22501410  | 0.26029570  | 2.66194880  |
| C  | -1.23179330 | 0.24514410  | -2.66090170 |
| C  | -0.00340210 | 0.22613710  | -3.33254170 |
| C  | 1.22501410  | 0.26029570  | -2.66194880 |
| H  | -2.14605930 | 0.30434210  | 3.26510540  |
| H  | -0.00395150 | 0.25243660  | 4.42064680  |
| H  | 2.13812890  | 0.33107510  | 3.26671340  |
| H  | 2.33698360  | 0.31422170  | 1.04850160  |
| H  | -2.34321610 | 0.28494230  | 1.04734710  |
| H  | -2.34321610 | 0.28494230  | -1.04734710 |
| H  | -2.14605930 | 0.30434210  | -3.26510540 |
| H  | -0.00395150 | 0.25243660  | -4.42064680 |
| H  | 2.13812890  | 0.33107510  | -3.26671340 |
| H  | 2.33698360  | 0.31422170  | -1.04850160 |
| N  | 0.02928950  | -2.23223390 | 0.00000000  |
| H  | -0.90461460 | -2.64614190 | 0.00000000  |
| H  | 0.52548890  | -2.56577400 | -0.82852770 |
| H  | 0.52548890  | -2.56577400 | 0.82852770  |

Table S21

Structure of  $\text{FeL}_2\text{CN}^-$ , singlet, atomic coordinates in Å.

|    |            |             |            |
|----|------------|-------------|------------|
| Fe | 0.00000000 | 0.00000000  | 0.18214820 |
| N  | 1.35699070 | 1.33536960  | 0.36003930 |
| N  | 1.35699070 | -1.33536960 | 0.36003930 |

|   |             |             |             |
|---|-------------|-------------|-------------|
| N | -1.35699070 | -1.33536960 | 0.36003930  |
| N | -1.35699070 | 1.33536960  | 0.36003930  |
| C | 1.23136980  | 2.65852020  | 0.36363940  |
| C | 0.00000000  | 3.33350890  | 0.33922450  |
| C | -1.23136980 | 2.65852020  | 0.36363940  |
| C | 1.23136980  | -2.65852020 | 0.36363940  |
| C | 0.00000000  | -3.33350890 | 0.33922450  |
| C | -1.23136980 | -2.65852020 | 0.36363940  |
| H | 2.14765370  | 3.26710810  | 0.39701040  |
| H | 0.00000000  | 4.42300160  | 0.35980820  |
| H | -2.14765370 | 3.26710810  | 0.39701040  |
| H | -2.34107800 | 1.04429280  | 0.32381920  |
| H | 2.34107800  | 1.04429280  | 0.32381920  |
| H | 2.34107800  | -1.04429280 | 0.32381920  |
| H | 2.14765370  | -3.26710810 | 0.39701040  |
| H | 0.00000000  | -4.42300160 | 0.35980820  |
| H | -2.14765370 | -3.26710810 | 0.39701040  |
| H | -2.34107800 | -1.04429280 | 0.32381920  |
| C | 0.00000000  | 0.00000000  | -1.65491640 |
| N | 0.00000000  | 0.00000000  | -2.83570620 |

Table S22

Structure of  $\text{FeL}_2\text{CN}^-$ , triplet, atomic coordinates in Å.

|    |             |             |            |
|----|-------------|-------------|------------|
| Fe | 0.00000000  | 0.00000000  | 0.19416790 |
| N  | 1.35724050  | 1.33573210  | 0.40296040 |
| N  | 1.35724050  | -1.33573210 | 0.40296040 |
| N  | -1.35724050 | -1.33573210 | 0.40296040 |
| N  | -1.35724050 | 1.33573210  | 0.40296040 |
| C  | 1.22975670  | 2.65974030  | 0.42268400 |
| C  | 0.00000000  | 3.33392990  | 0.38214280 |
| C  | -1.22975670 | 2.65974030  | 0.42268400 |
| C  | 1.22975670  | -2.65974030 | 0.42268400 |
| C  | 0.00000000  | -3.33392990 | 0.38214280 |
| C  | -1.22975670 | -2.65974030 | 0.42268400 |
| H  | 2.14436060  | 3.26750700  | 0.48272160 |
| H  | 0.00000000  | 4.42330370  | 0.40157580 |
| H  | -2.14436060 | 3.26750700  | 0.48272160 |
| H  | -2.33906960 | 1.04190090  | 0.43987740 |
| H  | 2.33906960  | 1.04190090  | 0.43987740 |
| H  | 2.33906960  | -1.04190090 | 0.43987740 |
| H  | 2.14436060  | -3.26750700 | 0.48272160 |
| H  | 0.00000000  | -4.42330370 | 0.40157580 |
| H  | -2.14436060 | -3.26750700 | 0.48272160 |

|   |             |             |             |
|---|-------------|-------------|-------------|
| H | -2.33906960 | -1.04190090 | 0.43987740  |
| C | 0.00000000  | 0.00000000  | -1.95862640 |
| N | 0.00000000  | 0.00000000  | -3.13510650 |

Table S23

Structure of FeL<sub>2</sub>SH, doublet, atomic coordinates in Å.

|    |             |             |             |
|----|-------------|-------------|-------------|
| Fe | -0.00352460 | -0.17590940 | 0.00000000  |
| N  | -1.35286510 | -0.37903260 | 1.31916590  |
| N  | -1.35286510 | -0.37903260 | -1.31916590 |
| N  | 1.33550720  | -0.42014390 | -1.31458180 |
| N  | 1.33550720  | -0.42014390 | 1.31458180  |
| C  | -1.23112600 | -0.40865700 | 2.64258980  |
| C  | -0.00552840 | -0.39963640 | 3.31562340  |
| C  | 1.21654790  | -0.44630950 | 2.63948820  |
| C  | -1.23112600 | -0.40865700 | -2.64258980 |
| C  | -0.00552840 | -0.39963640 | -3.31562340 |
| C  | 1.21654790  | -0.44630950 | -2.63948820 |
| H  | -2.14857330 | -0.47004900 | 3.24002060  |
| H  | -0.00445560 | -0.42946980 | 4.40310140  |
| H  | 2.13371590  | -0.53817470 | 3.23335520  |
| H  | 2.31470870  | -0.48245160 | 1.01843410  |
| H  | -2.33402480 | -0.40480740 | 1.02530440  |
| H  | -2.33402480 | -0.40480740 | -1.02530440 |
| H  | -2.14857330 | -0.47004900 | -3.24002060 |
| H  | -0.00445560 | -0.42946980 | -4.40310140 |
| H  | 2.13371590  | -0.53817470 | -3.23335520 |
| H  | 2.31470870  | -0.48245160 | -1.01843410 |
| S  | -0.00309900 | 2.01947150  | 0.00000000  |
| H  | 1.33272060  | 2.26720190  | 0.00000000  |

Table S24

Structure of FeL<sub>2</sub>SH, quartet, atomic coordinates in Å.

|    |             |             |             |
|----|-------------|-------------|-------------|
| Fe | 0.01496160  | -0.13001700 | 0.00000000  |
| N  | -1.32235060 | -0.55063110 | 1.34386540  |
| N  | -1.32235060 | -0.55063110 | -1.34386540 |
| N  | 1.38207460  | -0.38409340 | -1.35001410 |
| N  | 1.38207460  | -0.38409340 | 1.35001410  |
| C  | -1.19019630 | -0.57240620 | 2.66048600  |
| C  | 0.02572970  | -0.46761670 | 3.34356580  |
| C  | 1.24797670  | -0.43515190 | 2.66679230  |
| C  | -1.19019630 | -0.57240620 | -2.66048600 |
| C  | 0.02572970  | -0.46761670 | -3.34356580 |



|   |             |             |             |
|---|-------------|-------------|-------------|
| C | 1.24797670  | -0.43515190 | -2.66679230 |
| H | -2.10111510 | -0.69939500 | 3.25936070  |
| H | 0.02451850  | -0.49709400 | 4.43022300  |
| H | 2.16510920  | -0.46925460 | 3.26865630  |
| H | 2.36220250  | -0.39542300 | 1.05847580  |
| H | -2.29460480 | -0.66651080 | 1.04911100  |
| H | -2.29460480 | -0.66651080 | -1.04911100 |
| H | -2.10111510 | -0.69939500 | -3.25936070 |
| H | 0.02451850  | -0.49709400 | -4.43022300 |
| H | 2.16510920  | -0.46925460 | -3.26865630 |
| H | 2.36220250  | -0.39542300 | -1.05847580 |
| S | -0.18658070 | 2.24152760  | 0.00000000  |
| H | 1.14391570  | 2.48999840  | 0.00000000  |

Table S25

Structure of FeL<sub>2</sub>Cl, doublet, atomic coordinates in Å.

|    |             |             |             |
|----|-------------|-------------|-------------|
| Fe | 0.00000000  | 0.00000000  | 0.20584840  |
| N  | -1.34023150 | 1.31934600  | 0.41897910  |
| N  | -1.34023150 | -1.31934600 | 0.41897910  |
| N  | 1.34023150  | -1.31934600 | 0.41897910  |
| N  | 1.34023150  | 1.31934600  | 0.41897910  |
| C  | -1.22337780 | 2.64321530  | 0.43943430  |
| C  | 0.00000000  | 3.31887360  | 0.41897910  |
| C  | 1.22337780  | 2.64321530  | 0.43943430  |
| C  | -1.22337780 | -2.64321530 | 0.43943430  |
| C  | 0.00000000  | -3.31887360 | 0.41897910  |
| C  | 1.22337780  | -2.64321530 | 0.43943430  |
| H  | -2.14282400 | 3.23717550  | 0.49972000  |
| H  | 0.00000000  | 4.40638740  | 0.44340860  |
| H  | 2.14282400  | 3.23717550  | 0.49972000  |
| H  | 2.32047310  | 1.02222080  | 0.43115170  |
| H  | -2.32047310 | 1.02222080  | 0.43115170  |
| H  | -2.32047310 | -1.02222080 | 0.43115170  |
| H  | -2.14282400 | -3.23717550 | 0.49972000  |
| H  | 0.00000000  | -4.40638740 | 0.44340860  |
| H  | 2.14282400  | -3.23717550 | 0.49972000  |
| H  | 2.32047310  | -1.02222080 | 0.43115170  |
| Cl | 0.00000000  | 0.00000000  | -1.99686980 |

Table S26

Structure of FeL<sub>2</sub>Cl, quartet, atomic coordinates in Å.

|    |            |            |            |
|----|------------|------------|------------|
| Fe | 0.00000000 | 0.00000000 | 0.14919470 |
|----|------------|------------|------------|

|    |             |             |             |
|----|-------------|-------------|-------------|
| N  | -1.35416770 | 1.34526690  | 0.47332310  |
| N  | -1.35416770 | -1.34526690 | 0.47332310  |
| N  | 1.35416770  | -1.34526690 | 0.47332310  |
| N  | 1.35416770  | 1.34526690  | 0.47332310  |
| C  | -1.22564200 | 2.66671410  | 0.49975670  |
| C  | 0.00000000  | 3.35488900  | 0.47332310  |
| C  | 1.22564200  | 2.66671410  | 0.49975670  |
| C  | -1.22564200 | -2.66671410 | 0.49975670  |
| C  | 0.00000000  | -3.35488900 | 0.47332310  |
| C  | 1.22564200  | -2.66671410 | 0.49975670  |
| H  | -2.15170060 | 3.27161680  | 0.56407040  |
| H  | 0.00000000  | 4.45176220  | 0.49753540  |
| H  | 2.15170060  | 3.27161680  | 0.56407040  |
| H  | 2.33806680  | 1.04728730  | 0.50425320  |
| H  | -2.33806680 | 1.04728730  | 0.50425320  |
| H  | -2.33806680 | -1.04728730 | 0.50425320  |
| H  | -2.15170060 | -3.27161680 | 0.56407040  |
| H  | 0.00000000  | -4.45176220 | 0.49753540  |
| H  | 2.15170060  | -3.27161680 | 0.56407040  |
| H  | 2.33806680  | -1.04728730 | 0.50425320  |
| Cl | 0.00000000  | 0.00000000  | -2.13078090 |

Table S27

Structure of FeOL<sub>2</sub>Cl, doublet, atomic coordinates in Å.

|    |             |             |             |
|----|-------------|-------------|-------------|
| Fe | 0.00000000  | 0.00000000  | -0.32978040 |
| N  | -1.37723900 | 1.37667510  | -0.18354550 |
| N  | -1.37723900 | -1.37667510 | -0.18354550 |
| N  | 1.37723900  | -1.37667510 | -0.18354550 |
| N  | 1.37723900  | 1.37667510  | -0.18354550 |
| C  | -1.22397680 | 2.68304150  | -0.16226720 |
| C  | 0.00000000  | 3.35902250  | -0.18354550 |
| C  | 1.22397680  | 2.68304150  | -0.16226720 |
| C  | -1.22397680 | -2.68304150 | -0.16226720 |
| C  | 0.00000000  | -3.35902250 | -0.18354550 |
| C  | 1.22397680  | -2.68304150 | -0.16226720 |
| H  | -2.13836460 | 3.28704490  | -0.10475360 |
| H  | 0.00000000  | 4.44545390  | -0.16674390 |
| H  | 2.13836460  | 3.28704490  | -0.10475360 |
| H  | 2.34293440  | 1.06122070  | -0.09968920 |
| H  | -2.34293440 | 1.06122070  | -0.09968920 |
| H  | -2.34293440 | -1.06122070 | -0.09968920 |
| H  | -2.13836460 | -3.28704490 | -0.10475360 |
| H  | 0.00000000  | -4.44545390 | -0.16674390 |

|    |            |             |             |
|----|------------|-------------|-------------|
| H  | 2.13836460 | -3.28704490 | -0.10475360 |
| H  | 2.34293440 | -1.06122070 | -0.09968920 |
| O  | 0.00000000 | 0.00000000  | -1.93858390 |
| Cl | 0.00000000 | 0.00000000  | 2.06142120  |

Table S28

Structure of FeOL<sub>2</sub>Cl, quartet, atomic coordinates in Å.

|    |             |             |             |
|----|-------------|-------------|-------------|
| Fe | 0.00000000  | 0.00000000  | -0.25597740 |
| N  | -1.37014370 | 1.37252750  | -0.21043360 |
| N  | -1.37014370 | -1.37252750 | -0.21043360 |
| N  | 1.37014370  | -1.37252750 | -0.21043360 |
| N  | 1.37014370  | 1.37252750  | -0.21043360 |
| C  | -1.23381330 | 2.68103110  | -0.21243980 |
| C  | 0.00000000  | 3.35018080  | -0.21043360 |
| C  | 1.23381330  | 2.68103110  | -0.21243980 |
| C  | -1.23381330 | -2.68103110 | -0.21243980 |
| C  | 0.00000000  | -3.35018080 | -0.21043360 |
| C  | 1.23381330  | -2.68103110 | -0.21243980 |
| H  | -2.14457050 | 3.29190390  | -0.21013060 |
| H  | 0.00000000  | 4.43784060  | -0.20615330 |
| H  | 2.14457050  | 3.29190390  | -0.21013060 |
| H  | 2.34732990  | 1.07100110  | -0.21257000 |
| H  | -2.34732990 | 1.07100110  | -0.21257000 |
| H  | -2.34732990 | -1.07100110 | -0.21257000 |
| H  | -2.14457050 | -3.29190390 | -0.21013060 |
| H  | 0.00000000  | -4.43784060 | -0.20615330 |
| H  | 2.14457050  | -3.29190390 | -0.21013060 |
| H  | 2.34732990  | -1.07100110 | -0.21257000 |
| O  | 0.00000000  | 0.00000000  | -1.95448820 |
| Cl | 0.00000000  | 0.00000000  | 2.10809950  |

Table S29

Structure of FeL<sub>2</sub>OH<sub>2</sub>, singlet, atomic coordinates in Å.

|   |             |             |             |
|---|-------------|-------------|-------------|
| N | -0.21450000 | 1.38930000  | 1.38620000  |
| C | -0.23180000 | 1.23020000  | 2.69590000  |
| C | -0.20200000 | 0.00090000  | 3.36190000  |
| C | -0.23380000 | -1.22830000 | 2.69590000  |
| N | -0.21680000 | -1.38750000 | 1.38620000  |
| N | -0.21450000 | 1.38930000  | -1.38620000 |
| C | -0.23180000 | 1.23020000  | -2.69590000 |
| C | -0.20200000 | 0.00090000  | -3.36190000 |
| C | -0.23380000 | -1.22830000 | -2.69590000 |

|    |             |             |             |
|----|-------------|-------------|-------------|
| N  | -0.21680000 | -1.38750000 | -1.38620000 |
| H  | -0.28270000 | 2.36800000  | 1.12300000  |
| H  | -0.29030000 | 2.12620000  | 3.32040000  |
| H  | -0.22430000 | 0.00090000  | 4.44500000  |
| H  | -0.29370000 | -2.12420000 | 3.32040000  |
| H  | -0.29030000 | 2.12620000  | -3.32040000 |
| H  | -0.22430000 | 0.00090000  | -4.44500000 |
| H  | -0.29370000 | -2.12420000 | -3.32040000 |
| H  | -0.28650000 | -2.36610000 | -1.12300000 |
| H  | -0.28270000 | 2.36800000  | -1.12300000 |
| H  | -0.28650000 | -2.36610000 | 1.12300000  |
| Fe | -0.08860000 | 0.00080000  | 0.00000000  |
| O  | 1.92970000  | 0.00000000  | 0.00000000  |
| H  | 2.46530000  | 0.79420000  | 0.00000000  |
| H  | 2.46520000  | -0.79420000 | 0.00000000  |

Table S30

Structure of FeL<sub>2</sub>OH<sub>2</sub>, triplet, atomic coordinates in Å.

|    |             |             |             |
|----|-------------|-------------|-------------|
| N  | -0.23580000 | 1.37620000  | 1.37670000  |
| C  | -0.25180000 | 1.22460000  | 2.68980000  |
| C  | -0.22690000 | -0.00070000 | 3.35830000  |
| C  | -0.25110000 | -1.22610000 | 2.68980000  |
| N  | -0.23530000 | -1.37760000 | 1.37670000  |
| N  | -0.23580000 | 1.37620000  | -1.37670000 |
| C  | -0.25180000 | 1.22460000  | -2.68980000 |
| C  | -0.22690000 | -0.00070000 | -3.35830000 |
| C  | -0.25110000 | -1.22610000 | -2.68980000 |
| N  | -0.23530000 | -1.37760000 | -1.37670000 |
| H  | -0.30690000 | 2.35240000  | 1.10770000  |
| H  | -0.30390000 | 2.12550000  | 3.30620000  |
| H  | -0.24330000 | -0.00070000 | 4.44130000  |
| H  | -0.30210000 | -2.12700000 | 3.30620000  |
| H  | -0.30390000 | 2.12550000  | -3.30620000 |
| H  | -0.24330000 | -0.00070000 | -4.44130000 |
| H  | -0.30210000 | -2.12700000 | -3.30620000 |
| H  | -0.30550000 | -2.35380000 | -1.10770000 |
| H  | -0.30690000 | 2.35240000  | -1.10770000 |
| H  | -0.30550000 | -2.35380000 | 1.10770000  |
| Fe | -0.13220000 | -0.00080000 | 0.00000000  |
| O  | 2.21690000  | 0.00000000  | 0.00000000  |
| H  | 2.77520000  | 0.78240000  | 0.00000000  |
| H  | 2.77530000  | -0.78240000 | 0.00000000  |

Table S31

Structure of FePSH, doublet, atomic coordinates in Å

|    |             |             |             |
|----|-------------|-------------|-------------|
| Fe | -0.00005350 | 0.00956700  | 0.00000000  |
| N  | -1.40738510 | 0.21377680  | 1.39577640  |
| N  | 1.41244740  | 0.21024740  | 1.39688830  |
| N  | -1.40738510 | 0.21377680  | -1.39577640 |
| N  | 1.41244740  | 0.21024740  | -1.39688830 |
| C  | 1.23031330  | 0.15333470  | -2.76792730 |
| C  | 2.78495660  | 0.28401100  | -1.22453320 |
| C  | 3.46162540  | 0.28775840  | -2.49561340 |
| C  | 2.49580550  | 0.19930280  | -3.45388420 |
| C  | 0.00286860  | 0.10583400  | -3.40748930 |
| C  | -1.22451340 | 0.15583760  | -2.76722530 |
| C  | -2.48933350 | 0.20557400  | -3.45344040 |
| C  | -3.45601930 | 0.29693100  | -2.49590210 |
| C  | -2.78057600 | 0.29058870  | -1.22460710 |
| C  | -3.42579860 | 0.33506040  | 0.00000000  |
| C  | -2.78057600 | 0.29058870  | 1.22460710  |
| C  | -3.45601930 | 0.29693100  | 2.49590210  |
| C  | -2.48933350 | 0.20557400  | 3.45344040  |
| C  | -1.22451340 | 0.15583760  | 2.76722530  |
| C  | 0.00286860  | 0.10583400  | 3.40748930  |
| C  | 1.23031330  | 0.15333470  | 2.76792730  |
| C  | 2.49580550  | 0.19930280  | 3.45388420  |
| C  | 3.46162540  | 0.28775840  | 2.49561340  |
| C  | 2.78495660  | 0.28401100  | 1.22453320  |
| C  | 3.43009160  | 0.32736760  | 0.00000000  |
| H  | 4.51888320  | 0.38185380  | 0.00000000  |
| H  | 4.53915890  | 0.35209710  | -2.62065300 |
| H  | 2.61245970  | 0.17686960  | -4.53423600 |
| H  | 0.00234800  | 0.06498380  | -4.49705980 |
| H  | -2.60500860 | 0.18460740  | -4.53393190 |
| H  | -4.53324650 | 0.36461670  | -2.62193930 |
| H  | -4.51448320 | 0.39261850  | 0.00000000  |
| H  | -4.53324650 | 0.36461670  | 2.62193930  |
| H  | -2.60500860 | 0.18460740  | 4.53393190  |
| H  | 0.00234800  | 0.06498380  | 4.49705980  |
| H  | 2.61245970  | 0.17686960  | 4.53423600  |
| H  | 4.53915890  | 0.35209710  | 2.62065300  |
| S  | 0.01560540  | -2.13877500 | 0.00000000  |
| H  | -1.31995960 | -2.40186020 | 0.00000000  |

Table S32

Structure of FePSH, quartet, atomic coordinates in Å

|    |             |             |             |
|----|-------------|-------------|-------------|
| Fe | -0.00356330 | -0.04286290 | 0.00000000  |
| N  | -1.41461370 | 0.22781550  | 1.41170220  |
| N  | 1.41131280  | 0.23592380  | 1.41145480  |
| N  | -1.41461370 | 0.22781550  | -1.41170220 |
| N  | 1.41131280  | 0.23592380  | -1.41145480 |
| C  | 1.22637420  | 0.24141560  | -2.78078110 |
| C  | 2.77885630  | 0.27400730  | -1.22793000 |
| C  | 3.45863820  | 0.30456070  | -2.49685890 |
| C  | 2.49375250  | 0.28210560  | -3.46182110 |
| C  | -0.00121400 | 0.22856390  | -3.42522850 |
| C  | -1.22917120 | 0.23714210  | -2.78141900 |
| C  | -2.49629030 | 0.27966270  | -3.46221080 |
| C  | -3.46165790 | 0.30093120  | -2.49731980 |
| C  | -2.78267810 | 0.26817430  | -1.22823310 |
| C  | -3.42749000 | 0.27927130  | 0.00000000  |
| C  | -2.78267810 | 0.26817430  | 1.22823310  |
| C  | -3.46165790 | 0.30093120  | 2.49731980  |
| C  | -2.49629030 | 0.27966270  | 3.46221080  |
| C  | -1.22917120 | 0.23714210  | 2.78141900  |
| C  | -0.00121400 | 0.22856390  | 3.42522850  |
| C  | 1.22637420  | 0.24141560  | 2.78078110  |
| C  | 2.49375250  | 0.28210560  | 3.46182110  |
| C  | 3.45863820  | 0.30456070  | 2.49685890  |
| C  | 2.77885630  | 0.27400730  | 1.22793000  |
| C  | 3.42368770  | 0.28445910  | 0.00000000  |
| H  | 4.51330030  | 0.31083570  | 0.00000000  |
| H  | 4.53803210  | 0.34091040  | -2.61800130 |
| H  | 2.61407020  | 0.29708900  | -4.54173480 |
| H  | -0.00097350 | 0.23299980  | -4.51515380 |
| H  | -2.61646910 | 0.29786840  | -4.54209250 |
| H  | -4.54094950 | 0.33920690  | -2.61898800 |
| H  | -4.51705260 | 0.30980360  | 0.00000000  |
| H  | -4.54094950 | 0.33920690  | 2.61898800  |
| H  | -2.61646910 | 0.29786840  | 4.54209250  |
| H  | -0.00097350 | 0.23299980  | 4.51515380  |
| H  | 2.61407020  | 0.29708900  | 4.54173480  |
| H  | 4.53803210  | 0.34091040  | 2.61800130  |
| S  | 0.06137420  | -2.38624830 | 0.00000000  |
| H  | -1.28240080 | -2.55225330 | 0.00000000  |

Table S33

Structure of FePIIm, singlet, atomic coordinates in Å

|    |             |             |             |
|----|-------------|-------------|-------------|
| C  | -2.77047840 | -0.55487600 | 1.22903880  |
| N  | -1.39436540 | -0.52079530 | 1.40419800  |
| C  | -1.21636210 | -0.52687680 | 2.77939300  |
| C  | -2.48472250 | -0.57678430 | 3.46218460  |
| C  | -3.45062860 | -0.59354880 | 2.49980440  |
| Fe | 0.00960630  | -0.36069210 | 0.00000000  |
| N  | -1.39436540 | -0.52079530 | -1.40419800 |
| C  | -1.21636210 | -0.52687680 | -2.77939300 |
| C  | -2.48472250 | -0.57678430 | -3.46218460 |
| C  | -3.45062860 | -0.59354880 | -2.49980440 |
| C  | -2.77047840 | -0.55487600 | -1.22903880 |
| C  | 0.01159970  | -0.50650690 | -3.42149860 |
| C  | 1.23916840  | -0.50612550 | -2.77921160 |
| N  | 1.41666840  | -0.49601050 | -1.40386670 |
| C  | 2.79232830  | -0.51516330 | -1.22853940 |
| C  | 3.47347650  | -0.54576790 | -2.49912210 |
| C  | 2.50842080  | -0.53973370 | -3.46192660 |
| C  | -3.41352330 | -0.56053940 | 0.00000000  |
| C  | 3.43536320  | -0.51406130 | 0.00000000  |
| C  | 2.79232830  | -0.51516330 | 1.22853940  |
| N  | 1.41666840  | -0.49601050 | 1.40386670  |
| C  | 1.23916840  | -0.50612550 | 2.77921160  |
| C  | 2.50842080  | -0.53973370 | 3.46192660  |
| C  | 3.47347650  | -0.54576790 | 2.49912210  |
| C  | 0.01159970  | -0.50650690 | 3.42149860  |
| H  | -4.50396090 | -0.59198480 | 0.00000000  |
| H  | -4.52980550 | -0.64256870 | -2.62144980 |
| H  | -2.60287030 | -0.60726620 | -4.54240670 |
| H  | 0.01178590  | -0.51658790 | -4.51217570 |
| H  | 2.62731910  | -0.56800220 | -4.54209090 |
| H  | 4.55326080  | -0.58037010 | -2.61993080 |
| H  | 4.52602620  | -0.53158350 | 0.00000000  |
| H  | 4.55326080  | -0.58037010 | 2.61993080  |
| H  | 2.62731910  | -0.56800220 | 4.54209090  |
| H  | 0.01178590  | -0.51658790 | 4.51217570  |
| H  | -2.60287030 | -0.60726620 | 4.54240670  |
| H  | -4.52980550 | -0.64256870 | 2.62144980  |
| N  | -0.02057780 | 1.53207710  | 0.00000000  |
| C  | -1.11355330 | 2.29579360  | 0.00000000  |
| N  | -0.75043320 | 3.60620740  | 0.00000000  |
| C  | 0.62771290  | 3.68007150  | 0.00000000  |
| C  | 1.07268240  | 2.38270400  | 0.00000000  |
| H  | -2.13640510 | 1.93853340  | 0.00000000  |
| H  | -1.39216450 | 4.38961210  | 0.00000000  |

|   |            |            |            |
|---|------------|------------|------------|
| H | 1.15958390 | 4.62308300 | 0.00000000 |
| H | 2.08618430 | 2.00140350 | 0.00000000 |

Table S34

Structure of FePIIm, triplet, atomic coordinates in Å

|    |             |             |             |
|----|-------------|-------------|-------------|
| C  | -2.77832390 | -0.64434610 | 1.22958930  |
| N  | -1.40691910 | -0.56733250 | 1.40591750  |
| C  | -1.21805760 | -0.55721920 | 2.77649630  |
| C  | -2.48305200 | -0.62162860 | 3.46154600  |
| C  | -3.45366960 | -0.67860640 | 2.50232810  |
| Fe | 0.01414540  | -0.41502250 | 0.00000000  |
| N  | -1.40691910 | -0.56733250 | -1.40591750 |
| C  | -1.21805760 | -0.55721920 | -2.77649630 |
| C  | -2.48305200 | -0.62162860 | -3.46154600 |
| C  | -3.45366960 | -0.67860640 | -2.50232810 |
| C  | -2.77832390 | -0.64434610 | -1.22958930 |
| C  | 0.01439460  | -0.52185330 | -3.41487120 |
| C  | 1.24658530  | -0.53124380 | -2.77576910 |
| N  | 1.43539250  | -0.53735370 | -1.40528790 |
| C  | 2.80780440  | -0.58639100 | -1.22900260 |
| C  | 3.48400220  | -0.60716020 | -2.50165120 |
| C  | 2.51301380  | -0.56960350 | -3.46083150 |
| C  | -3.42327330 | -0.67658390 | 0.00000000  |
| C  | 3.45331050  | -0.60657270 | 0.00000000  |
| C  | 2.80780440  | -0.58639100 | 1.22900260  |
| N  | 1.43539250  | -0.53735370 | 1.40528790  |
| C  | 1.24658530  | -0.53124380 | 2.77576910  |
| C  | 2.51301380  | -0.56960350 | 3.46083150  |
| C  | 3.48400220  | -0.60716020 | 2.50165120  |
| C  | 0.01439460  | -0.52185330 | 3.41487120  |
| H  | -4.51192790 | -0.74019970 | 0.00000000  |
| H  | -4.53088530 | -0.74741330 | -2.63012850 |
| H  | -2.59965790 | -0.63265870 | -4.54253510 |
| H  | 0.01477110  | -0.52011790 | -4.50563840 |
| H  | 2.62994400  | -0.57660940 | -4.54179320 |
| H  | 4.56247700  | -0.65223540 | -2.62891740 |
| H  | 4.54300520  | -0.64643280 | 0.00000000  |
| H  | 4.56247700  | -0.65223540 | 2.62891740  |
| H  | 2.62994400  | -0.57660940 | 4.54179320  |
| H  | 0.01477110  | -0.52011790 | 4.50563840  |
| H  | -2.59965790 | -0.63265870 | 4.54253510  |
| H  | -4.53088530 | -0.74741330 | 2.63012850  |
| N  | -0.01655860 | 1.81697290  | 0.00000000  |



|   |             |            |            |
|---|-------------|------------|------------|
| C | -1.11235770 | 2.56079890 | 0.00000000 |
| N | -0.78857000 | 3.88263410 | 0.00000000 |
| C | 0.59064530  | 3.98464410 | 0.00000000 |
| C | 1.05129720  | 2.69059840 | 0.00000000 |
| H | -2.13094480 | 2.18700000 | 0.00000000 |
| H | -1.44445610 | 4.65584180 | 0.00000000 |
| H | 1.09908080  | 4.94128490 | 0.00000000 |
| H | 2.07382840  | 2.32990470 | 0.00000000 |

Table S35. The singlet-triplet excitation energies of FeA<sub>2</sub> with spin flip up and spin flip down schemes respectively, in eV.

| FeA <sub>2</sub> | Spin flip up |                    | Spin flip down |                    |
|------------------|--------------|--------------------|----------------|--------------------|
|                  | S-T gaps     | D<S <sup>2</sup> > | S-T gaps       | D<S <sup>2</sup> > |
| <b>SVWN5</b>     | 0.09         | 0                  | 0.05           | -0.0007            |
| <b>BLYP</b>      | -0.17        | 0                  | 1.01           | -0.5027            |
| <b>B3LYP</b>     | -0.92        | 0                  | -0.31          | -0.0003            |
| <b>BHandHLYP</b> | -1.03        | 0                  | -0.21          | -0.0001            |
| <b>CAM-B3LYP</b> | -0.95        | 0                  | -0.28          | -0.0002            |
| <b>LC-BLYP</b>   | -0.27        | 0                  | 0.42           | -0.9877            |
| <b>CCSD(T)</b>   | -1.54        |                    | -1.54          |                    |
